# Supplementary material for: Reduction in Five Harmful Substances in Fried Potato Chips by Pre-Soaking Treatment with Different Tea Extracts
Source: MDPI journal article supplement (doi:10.3390/foods12020321), 2023-01-09
Supplement: s1 [file s1]

# Reduction of five harmful substances in fried potato chips by pre-soaking treatment with different tea extracts

Weitao Wang <sup>1,†</sup>, Huaixu Wang <sup>1,†</sup>, Zhongjun Wu <sup>2</sup>, Tingting Duan <sup>3</sup>, Pengzhan Liu <sup>4</sup>, Shiyi Ou <sup>2,5</sup>, Hani El-Nezami <sup>1,6,\*</sup> and Jie Zheng <sup>2,5,\*</sup>

**Table S1.** Mass spectrometric parameters for SRM analysis of catechins in different teas.

| Analyte | Operate mode | Precursor ion | S-lens (eV) | Fragment ion | Collision energy (eV) | Retention time (min) |
|---------|--------------|---------------|-------------|--------------|-----------------------|----------------------|
| C       | Positive     | 290.700       | 53          | 139.016*     | 15                    | 4.98                 |
|         |              |               |             | 147.043      | 19                    |                      |
| ECG     | Positive     | 443.026       | 55          | 122.974*     | 24                    | 6.24                 |
|         |              |               |             | 138.990      | 42                    |                      |
| EGC     | Positive     | 307.018       | 54          | 139.036*     | 15                    | 4.74                 |
|         |              |               |             | 162.967      | 19                    |                      |
| EGCG    | Positive     | 459.035       | 52          | 138.999*     | 26                    | 5.33                 |
|         |              |               |             | 150.923      | 16                    |                      |
| EC      | Negative     | 289.000       | 62          | 245.049*     | 18                    | 5.57                 |
|         |              |               |             | 203.029      | 21                    |                      |
| CG      | Negative     | 440.950       | 77          | 168.967*     | 22                    | 6.42                 |
|         |              |               |             | 289.064      | 20                    |                      |
| GC      | Negative     | 305.000       | 64          | 125.040*     | 22                    | 3.37                 |
|         |              |               |             | 219.058      | 19                    |                      |
| GCG     | Negative     | 457.007       | 79          | 168.997*     | 19                    | 5.50                 |
|         |              |               |             | 124.974      | 44                    |                      |

\* Represents the fragment ion for quantification.
